(Parnley, L. F., Jr., North, R. L., and Pickens, G. E.: *Pulmonary Embolism as a Cause of Systemic Hypotension and Shock*, *Amer. J. Cardiol.* 15: 333 (Mar.) 1965.)

**HYPERBARIC OXYGENATION** Hyperbaric oxygenation was used in the treatment of purpura gangrenosa occurring in a 19 month old Negro child. Within three days, eight five-hour exposures were given at two atmospheres absolute pressure. The child was placed in a pediatric high humidity oxygen tent, and this was in turn placed inside the treatment compartment of the hyperbaric chamber. During pressurization the oxygen tension of inspired air exceeded 1,400 mm. of mercury. The tent was usually opened during the midpoint of each five-hour period for 15 to 20 minutes for medication, nursing care, and to interrupt pulmonary exposure to extreme hyperoxia. Respiration of oxygen at increased atmospheric pressures for prolonged periods is associated with a specific, progressive picture of pulmonary insufficiency terminating in death. However, patients have not demonstrated recognizable symptoms of pulmonary toxicity when breathing oxygen at two atmospheres pressure. (Waddell, W. B., and others: *Purpura Gangrenosa Treated with Hyperbaric Oxygenation*, *J.A.M.A.* 191: 971 (Mar. 22) 1965.)

**PULMONARY EMBOLISM** The right heart of dogs was bypassed using a reservoir-pump system. Following experimental pulmonary embolization with glass microspheres or autologous clots, pulmonary artery pressure and pulmonary vascular resistance increased while arterial oxygen saturation decreased. Calculated venous admixture increased to 30 per cent of cardiac output. Imposition of 20 cm. of water resistance to exhalation restored saturation and admixture to pre-embolization values. Decrease in hemoglobin saturation in pulmonary embolism is caused by perfusion of poorly or nonventilated areas of lung caused by collapse of respiratory units due to presence of edema fluid. Pulmonary hypertension following pulmonary embolization may be due to vasoconstriction in addition to mechanical blocking of pulmonary vessels. (Caldini, P.: *Pulmonary Hemodynamics and Arterial Oxy-*

*gen Saturation in Pulmonary Embolism*, *J. Appl. Physiol.* 20: 184 (Mar.) 1965.)

**EMBOLI** During extracorporeal circulation a wide variation in tolerance to air emboli was found in dogs. Air passed rapidly through the coronary capillaries in some while forming a permanent obstruction in others. Carbon dioxide emboli, though causing much less injury than air, were not completely innocuous. The most effective method for prevention of air emboli is the use of induced ventricular fibrillation in combination with decompression of the left ventricle. If emboli have occurred, increasing the perfusion pressure and manually massaging the heart is usually effective. (Spencer, F. C., and others: *Significance of Air Embolism During Cardiopulmonary Bypass*, *J. Thor. Cardio. Surg.* 49: 615 (Apr.) 1965.)

**PULMONARY EMBOLI** Transient pulmonary hypertension lasting up to an hour can be produced in dogs by the introduction of air into the pulmonary artery. This hypertension is due to mechanical increase in pulmonary vascular resistance by the surface tensions of the many bubbles in small vessels, which also cause temporary decrease in compliance and decrease in pulmonary function. A major portion of the vascular bed needs to be obstructed by air emboli before any pressure change is apparent. Pulmonary air embolism during open heart surgery, although tolerated in a person with normal lungs, may result in significant increase in pulmonary hypertension at the critical time of bypass termination in patients with preoperative pulmonary vascular changes. (Anderson, R. M., and others: *Pulmonary Air Emboli During Cardiac Surgery*, *J. Thor. Cardio. Surg.* 49: 440 (Mar.) 1965.)

**HYPOXIA** In chronic hypoxia at high altitudes cardiac output is not increased because of a compensatory increase in oxygen-carrying capacity of blood. Increased volume of ventilation was achieved entirely by greater tidal volume; however, the number of moles of air ventilated actually decreased. Basal oxygen uptake increased slightly. With exercise, at any given level of oxygen uptake, the volume of air ventilated was greater at high altitude.
